## Correction

# Correction: Differential Effects of Collagen Prolyl 3-Hydroxylation on Skeletal Tissues

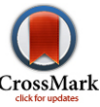

The *PLOS Genetics* Staff

Figure 9 is incorrect. It contains components that are duplicated and do not correspond to what is stated in the figure legend or in the text. Specifically the *Lepre1*<sup>H662A/H662A</sup> gel in panel A is a duplication of the *Lepre1*<sup>+/+</sup> gel, and the *Lepre1*<sup>+/+</sup> lane in panel C is a duplication of the *Lepre1*<sup>H662A/H662A</sup> lane. The authors have provided a corrected version here. This corrected version corresponds to what is stated in the figure legend and in the text.

**Citation:** The *PLOS Genetics* Staff (2014) Correction: Differential Effects of Collagen Prolyl 3-Hydroxylation on Skeletal Tissues. *PLoS Genet* 10(6): e1004473. doi:10.1371/journal.pgen.1004473

**Published:** June 3, 2014

**Copyright:** © 2014 The *PLOS Genetics* Staff. This is an open-access article distributed under the terms of the Creative Commons Attribution License, which permits unrestricted use, distribution, and reproduction in any medium, provided the original author and source are credited.

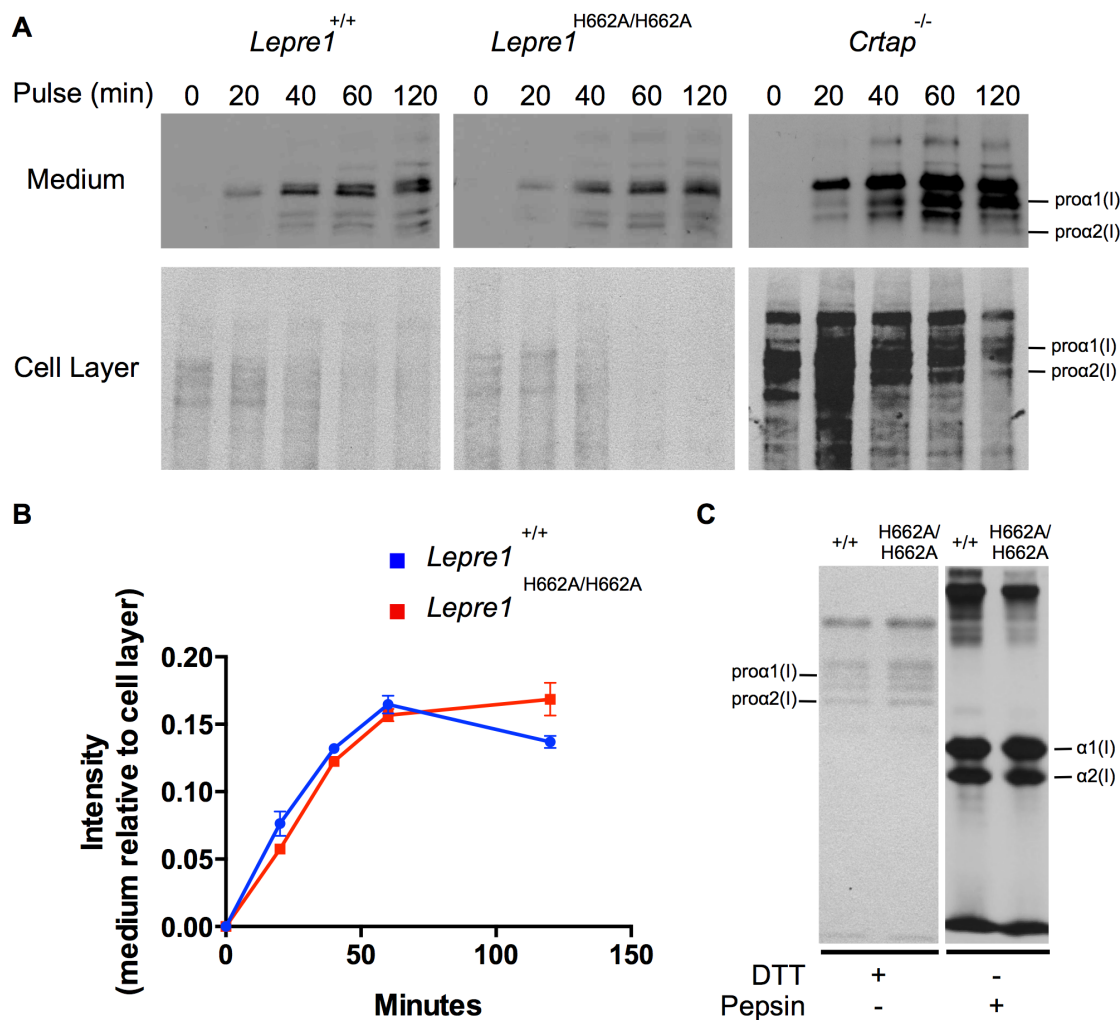

**Figure 9: *Lepre1*<sup>H662A/H662A</sup> fibroblast procollagen secretion rate and collagen modification is normal.** Analysis of procollagen secretion by the collagen pulse-chase assay suggests that the procollagen secreted from *Lepre1*<sup>H662A/H662A</sup> fibroblasts is similar to *Lepre1*<sup>+/+</sup> fibroblasts (A, B). Additionally, there does not appear to be a decrease in the amount of procollagen secreted from the *Lepre1*<sup>H662A/H662A</sup> fibroblasts in comparison to *Lepre1*<sup>+/+</sup> fibroblasts (A, B). These findings are in contrast to that of the *Crtap*<sup>-/-</sup> fibroblasts, which have an increase in the rate of procollagen secretion (A). Collagen modification was assessed using the collagen steady-state assay. We observed no difference in the migration pattern of procollagen and collagen isolated from *Lepre1*<sup>+/+</sup> and *Lepre1*<sup>H662A/H662A</sup> (H662A/H662A) fibroblasts (C). These assays were repeated three times. doi:10.1371/journal.pgen.1004121.g009

## Reference

- Homan EP, Lietman C, Grafe I, Lenington J, Morello R, et al. (2014) Differential Effects of Collagen Prolyl 3-Hydroxylation on Skeletal Tissues. PLoS Genet 10(1): e1004121. doi:10.1371/journal.pgen.1004121
